# Supplementary material
Source: PubMed Central journal article supplement (PMC3666830)
Supplement: 12687_2013_140_MOESM2_ESM.pdf [file 12687_2013_140_MOESM2_ESM.pdf]

## **Genetic susceptibility testing for chronic disease and intention for behavior change in healthy young adults**

***Journal of Community Genetics***

Running title: Chronic disease genetic testing in young adults

Jason L. Vassy, MD, MPH, SM<sup>1,2,3</sup>

Karen Donelan, EdM, ScD<sup>3,4</sup>

Marie-France Hivert, MD<sup>5</sup>

Robert C Green, MD, MPH<sup>3,6,7</sup>

Richard W. Grant, MD, MPH<sup>8</sup>

### **Corresponding Author:**

Jason L. Vassy, MD, MPH, SM

Section of General Internal Medicine, 150 Huntington Avenue, Bldg 9, Ste 425, Boston, MA 02130

Tel. 314-239-3741, Fax 857-364-6990

Email: [jvassy@partners.org](mailto:jvassy@partners.org)

**Supplemental Table 2: Anticipated timing of improvement in diet or physical activity from high-risk genetic results**

|                           |                         | Diet |             |                   |                   | Physical activity |             |                   |                   |
|---------------------------|-------------------------|------|-------------|-------------------|-------------------|-------------------|-------------|-------------------|-------------------|
|                           |                         | Now  | ≥5<br>years | OR                | AOR               | Now               | ≥5<br>years | OR                | AOR               |
| Current diet              | Poorer than average     | 86   | 14          | 0.37 (0.13, 1.11) | 0.35 (0.09, 1.44) | 90                | 10          | 0.34 (0.10, 1.21) | 0.63 (0.17, 2.33) |
|                           | Average                 | 95   | 5           | 1.01 (0.33, 3.08) | 0.74 (0.20, 2.78) | 95                | 5           | 0.76 (0.21, 2.76) | 0.77 (0.19, 3.11) |
|                           | Better than average     | 94   | 6           | ref               | ref               | 96                | 4           | ref               | ref               |
| Current physical activity | Less than average       | 88   | 12          | 0.41 (0.13, 1.27) | 0.48 (0.15, 1.60) | 91                | 9           | 0.34 (0.09, 1.28) | 0.28 (0.07, 1.23) |
|                           | Average                 | 95   | 5           | 0.97 (0.29, 3.29) | 0.96 (0.26, 3.58) | 96                | 4           | 0.76 (0.18, 3.28) | 0.69 (0.16, 3.07) |
|                           | More than average       | 95   | 5           | ref               | ref               | 97                | 3           | ref               | ref               |
| BMI                       | <25 kg/m <sup>2</sup>   | 93   | 7           | ref               | ref               | 97                | 3           | ref               | ref               |
|                           | 25-30 kg/m <sup>2</sup> | 95   | 5           | 1.45 (0.49, 4.29) | 1.75 (0.52, 5.90) | 94                | 6           | 0.49 (0.14, 1.68) | 0.52 (0.12, 2.16) |
|                           | ≥30 kg/m <sup>2</sup>   | 90   | 10          | 0.65 (0.25, 1.70) | 1.07 (0.33, 3.46) | 92                | 8           | 0.36 (0.12, 1.08) | 0.57 (0.17, 1.97) |
| FmHx DM                   | No                      | 92   | 8           | ref               | ref               | 94                | 6           | ref               | ref               |
|                           | Yes                     | 93   | 7           | 0.85 (0.34, 2.10) | 0.65 (0.25, 1.71) | 96                | 4           | 0.71 (0.24, 2.11) | 0.57 (0.17, 1.86) |
| ADA Risk                  | Low                     | 93   | 7           | ref               | ref               | 95                | 5           | ref               | ref               |
|                           | Medium to High          | 90   | 10          | 0.67 (0.27, 1.64) | 0.97 (0.34, 2.79) | 93                | 7           | 0.71 (0.27, 1.87) | 1.18 (0.40, 3.49) |

Odds ratios (OR) correspond to weighted logistic regression models predicting anticipated timing of improvement in health behaviors (now vs. 5 or more years from now) among respondents anticipating improvement in diet (n=411) or physical activity (n=419) in response to high-risk genetic susceptibility results. Adjusted ORs (AOR) adjusted for sex, race, education, and baseline diet or physical activity.
