# Supplementary material
Source: PubMed Central journal article supplement (PMC3666830)
Supplement: 12687_2013_140_MOESM3_ESM.pdf [file 12687_2013_140_MOESM3_ESM.pdf]

**Genetic susceptibility testing for chronic disease and intention for behavior change in healthy young adults**

***Journal of Community Genetics***

Running title: Chronic disease genetic testing in young adults

Jason L. Vassy, MD, MPH, SM<sup>1,2,3</sup>

Karen Donelan, EdM, ScD<sup>3,4</sup>

Marie-France Hivert, MD<sup>5</sup>

Robert C Green, MD, MPH<sup>3,6,7</sup>

Richard W. Grant, MD, MPH<sup>8</sup>

**Corresponding Author:**

Jason L. Vassy, MD, MPH, SM

Section of General Internal Medicine, 150 Huntington Avenue, Bldg 9, Ste 425,  
Boston, MA 02130

Tel. 314-239-3741, Fax 857-364-6990

Email: [jvassy@partners.org](mailto:jvassy@partners.org)

**Supplemental Table 3: Anticipated likelihood of improving health behaviors in response to low-risk genetic susceptibility for chronic diseases**

|                                   |                         | Diet                 |                      | Physical activity    |                       |
|-----------------------------------|-------------------------|----------------------|----------------------|----------------------|-----------------------|
|                                   |                         | OR (95% CI)          | AOR (95% CI)         | OR (95% CI)          | AOR (95% CI)          |
| Race                              | Non-Hispanic white      | ref                  | ref                  | ref                  | ref                   |
|                                   | Non-Hispanic black      | 1.64<br>(0.47, 5.73) | 1.65<br>(0.49, 5.53) | 1.60<br>(0.47, 5.46) | 1.58<br>(0.44, 5.62)  |
|                                   | Hispanic                | 1.64<br>(0.64, 4.16) | 1.60<br>(0.63, 4.11) | 0.82<br>(0.28, 2.40) | 0.82<br>(0.26, 2.54)  |
|                                   | Non-Hispanic other      | 3.19<br>(1.07, 9.49) | 3.31<br>(1.13, 9.68) | 2.71<br>(0.80, 9.16) | 3.27<br>(0.94, 11.33) |
| Current diet                      | Poorer than average     | 0.86<br>(0.34, 2.21) | 0.82<br>(0.29, 2.26) | 2.21<br>(0.76, 6.37) | 2.59<br>(0.77, 8.70)  |
|                                   | Average                 | 0.91<br>(0.37, 2.24) | 0.97<br>(0.41, 2.28) | 0.93<br>(0.31, 2.85) | 0.90<br>(0.28, 2.86)  |
|                                   | Better than average     | ref                  | ref                  | ref                  | ref                   |
| Current physical activity         | Poorer than average     | 1.65<br>(0.63, 4.32) | 2.00<br>(0.73, 5.43) | 1.17<br>(0.43, 3.24) | 1.09<br>(0.38, 3.15)  |
|                                   | Average                 | 1.48<br>(0.53, 4.16) | 1.61<br>(0.58, 4.50) | 0.97<br>(0.32, 2.93) | 1.03<br>(0.33, 3.26)  |
|                                   | Better than average     | ref                  | ref                  | ref                  | ref                   |
| BMI category                      | <25 kg/m <sup>2</sup>   | ref                  | ref                  | ref                  | ref                   |
|                                   | 25-30 kg/m <sup>2</sup> | 3.08<br>(1.23, 7.73) | 3.49<br>(1.34, 9.08) | 1.94<br>(0.76, 4.94) | 2.00<br>(0.74, 5.43)  |
|                                   | ≥30 kg/m <sup>2</sup>   | 1.83<br>(0.72, 4.69) | 2.23<br>(0.83, 5.97) | 1.16<br>(0.42, 3.16) | 1.14<br>(0.41, 3.22)  |
| Family history of chronic disease | No                      | ref                  | ref                  | ref                  | ref                   |
|                                   | Yes                     | 1.92<br>(0.90, 4.09) | 2.05<br>(0.91, 4.63) | 1.42<br>(0.63, 3.22) | 1.39<br>(0.60, 3.22)  |
| ADA diabetes risk                 | Low                     | ref                  | ref                  | ref                  | ref                   |
|                                   | Medium or High          | 0.79<br>(0.33, 1.88) | 0.79<br>(0.30, 2.06) | 0.80<br>(0.29, 2.15) | 0.71<br>(0.25, 2.00)  |

Odds ratios (OR) and 95% confidence intervals (CI) correspond to weighted logistic regression models predicting being “much less likely” or “somewhat less likely” to improve diet or physical activity in response to hypothetical low-risk genetic susceptibility to chronic disease. Adjusted OR (AOR) are adjusted for sex, race, educational attainment, and baseline diet or PA, respectively in each column.
